1 **The role of accelerated growth plate fusion in the absence of SOCS2 on osteoarthritis**  
2 **vulnerability**

3 Hasmik J. Samvelyan<sup>1,2</sup>, Carmen Huesa<sup>3</sup>, Lucy Cui Lin<sup>4</sup>, Colin Farquharson<sup>4</sup>, Katherine A.  
4 Staines<sup>1,2\*</sup>

5

6 <sup>1</sup>School of Pharmacy and Biomolecular Sciences, University of Brighton, Brighton UK

7 <sup>2</sup> Centre for Stress and Age-Related Disease, University of Brighton, Brighton, UK

8 <sup>3</sup>Institute of Infection, Immunity & Inflammation, College of Medical, Veterinary and Life  
9 Sciences, University of Glasgow

10 <sup>4</sup>The Roslin Institute, The University of Edinburgh, Edinburgh, UK

11

12

13 Corresponding author

14 Katherine Ann Staines, University of Brighton, Lewes Road, Brighton BN2 4GJ

15 Email: [k.staines@brighton.ac.uk](mailto:k.staines@brighton.ac.uk) Tel: 01273 642 094

16 ORCID ID: 0000-0002-8492-9778

17

18 **Key words:** osteoarthritis; SOCS2; cartilage; growth plate; bone; growth hormone

19

20

21 **Summary statement:** Deletion of SOCS2 results in accelerated growth plate fusion, however

22 this has no effect on osteoarthritis vulnerability.

23 **Abstract**

24 Osteoarthritis is the most prevalent systemic musculoskeletal disorder characterised by  
25 articular cartilage degeneration and subchondral bone (SCB) sclerosis. Here we sought to  
26 examine the contribution of accelerated growth to osteoarthritis development using a murine  
27 model of excessive longitudinal growth. Suppressor of cytokine signalling 2 (SOCS2) is a  
28 negative regulator of growth hormone (GH) signalling, thus mice deficient in SOCS2 (*Socs2*<sup>-/-</sup>)  
29 display accelerated bone growth. We examined vulnerability of *Socs2*<sup>-/-</sup> mice to  
30 osteoarthritis following surgical induction of disease (destabilisation of the medial meniscus  
31 (DMM)), and with ageing, by histology and micro-CT. We observed significant increase in  
32 number (WT DMM: 532±56; WT sham: 495±45; KO DMM: 169±49; KO sham:  
33 187±56; P<0.01) and density (WT DMM: 2.2±0.9; WT sham: 1.2±0.5; KO DMM:  
34 13.0±0.5; KO sham: 14.4±0.7) of growth plate bridges in *Socs2*<sup>-/-</sup> in comparison to wild-  
35 type (WT). Histological examination of WT and *Socs2*<sup>-/-</sup> knees revealed articular cartilage  
36 damage with DMM in comparison to sham (WT DMM: 3.4±0.4; WT sham: 0.3±0.05  
37 (P<0.05); KO DMM: 3.2±0.8; KO sham: 0.8±0.3). Articular cartilage lesion severity  
38 scores (mean and maximum) were similar in WT and *Socs2*<sup>-/-</sup> mice with either DMM, or  
39 with ageing. Micro-CT analysis revealed significant decreases in SCB thickness, epiphyseal  
40 trabecular number and thickness in the medial compartment of *Socs2*<sup>-/-</sup>, in comparison to WT  
41 (P<0.001). DMM had no effect on the SCB thickness in comparison to sham in either  
42 genotype. Together these data suggest that enhanced GH signalling through SOCS2 deletion  
43 accelerates growth plate fusion, however this has no effect on osteoarthritis vulnerability in  
44 this model.

45

46

47

48 **Introduction**

49 Osteoarthritis is the most prevalent systemic musculoskeletal disorder characterised by  
50 degeneration of joint articular cartilage, osteophyte formation, subchondral bone plate  
51 thickening, synovial proliferation and inflammation. Osteoarthritis has a multifactorial  
52 aetiology including ageing, trauma, obesity and heredity. Further, a complex interplay of  
53 major molecules and signalling pathways play indispensable roles in osteoarthritis  
54 development (Chang et al., 2019; Echtermeyer et al., 2009; Glasson et al., 2005; Saito et al.,  
55 2010; Wang et al., 2013). Despite this, effective disease-modifying treatments are currently  
56 limited.

57 Endochondral ossification is an essential process for longitudinal bone growth. It requires  
58 hypertrophic differentiation of chondrocytes characterised by secretion of type X collagen  
59 (COL10A1), matrix metalloproteinase-13 (MMP-13) and vascular endothelial growth factor  
60 (VEGF), followed by the subsequent degradation and conversion of the cartilage matrix into  
61 highly vascularised bone tissue (Kronenberg, 2003; Nagao et al., 2017). Osteoarthritis is  
62 widely accepted to involve the reversion of chondrocyte behaviour to an earlier  
63 developmental-like phenotype, which could drive the disease process. Indeed, re-expression  
64 of the type IIA procollagen, a spliced variant of the type II collagen gene (COL2A1)  
65 normally expressed in chondroprogenitor cells, in adult osteoarthritic articular chondrocytes  
66 indicates reversion of these cells to early developmental-like phenotype (Aigner et al., 1999).

67 Consistent with this, we have previously shown the abnormal deployment of a transient  
68 chondrocyte phenotype in the joints of a STR/ort mouse (Staines et al., 2016), a murine  
69 model for spontaneous osteoarthritis (Samvelyan et al., 2020). Further, we revealed  
70 accelerated long bone growth, a wider zone of growth plate proliferative chondrocytes, and  
71 widespread COL10A1 and MMP-13 expression beyond the expected hypertrophic zone  
72 distribution in these mice, which may underpin their osteoarthritis onset (Staines et al., 2016).

73 However, the precise contribution of accelerated growth to osteoarthritis development  
74 remains unclear.

75 Suppressor of cytokine signalling 2 (SOCS2), one of the members of the suppressor of  
76 cytokine signalling family glycoproteins, is implicated in cancer and disorders of immune  
77 system and central nervous system (Cramer et al., 2019; Keating and Nicholson, 2019;  
78 Letellier and Haan, 2016). SOCS2 has been shown as a primary intracellular suppressor of  
79 growth hormone signalling pathway, thus mice deficient in SOCS2 (*Socs2*<sup>-/-</sup>) display an  
80 excessive growth phenotype (Metcalf et al., 2000). Here we use this mouse model of  
81 accelerated bone growth to understand the association between aberrant growth dynamics and  
82 osteoarthritis development. To achieve this, we examined the vulnerability of *Socs2*<sup>-/-</sup> mice to  
83 osteoarthritis following surgical induction of disease (destabilisation of the medial meniscus  
84 (DMM)), and with ageing, by histology and micro computed tomography (micro-CT).

## 85 **Results**

### 86 *Socs2*<sup>-/-</sup> mice exhibit accelerated growth plate fusion

87 In accordance with the known effects of increased growth hormone (GH) signalling on the  
88 skeleton, we observed a significant increase in *Socs2*<sup>-/-</sup> body weight in comparison to WT  
89 controls in ageing (*Socs2*<sup>-/-</sup> 51.9g ± 1.4; WT 32.0g ± 0.5g; P<0.001), and throughout the 8-  
90 week DMM experiment (Table 1; P<0.001). We next sought to examine growth plate fusion  
91 in these mice. We observed a significant increase in the number of growth plate bridges in  
92 *Socs2*<sup>-/-</sup> mice in comparison to WT mice at both ages examined (Fig. 1). Specifically, we saw  
93 a significant increase in growth plate bridge number (Fig. 1A & B; WT DMM: 532 ± 56;  
94 WT sham: 495 ± 45; KO DMM: 169 ± 49; KO sham: 187 ± 56; P<0.01) and density  
95 (Fig. 1A & C; (WT DMM: 2.2 ± 0.9; WT sham: 1.2 ± 0.5; KO DMM: 13.0 ± 0.5; KO  
96 sham: 14.4 ± 0.7; P<0.01) in *Socs2*<sup>-/-</sup> sham and DMM tibiae (16 weeks of age), in  
97 comparison to WT sham and DMM tibiae (P<0.01). No differences in growth plate bridges

98 were observed with osteoarthritis intervention in either genotype. Concurrent with this, in  
99 aged mice (around 1 year), a significant increase in growth plate bridge number (Fig. 1D &  
100 E) and density (Fig. 1D & F) was observed in *Socs2*<sup>-/-</sup> mice in comparison to WT mice (WT:  
101 585 ± 70; KO: 1659 ± 91; densities – WT: 8.6 ± 2.2; KO: 21.3 ± 1.4 P<0.001).

#### 102 *Socs2* deletion does not exacerbate the development of osteoarthritis in a DMM model

103 Assessment of cartilage damage in the medial tibia of WT mice revealed an increased  
104 articular cartilage OARSI score with DMM in comparison to sham (P<0.05; Fig. 2A, C & D).  
105 However, no significant differences in the articular cartilage mean and maximum OARSI  
106 severity scores were observed between WT and *Socs2*<sup>-/-</sup> mice (Fig. 2C & 2D). Similarly,  
107 whilst osteophytes were observed in both WT and *Socs2*<sup>-/-</sup> DMM mice, there was no  
108 difference between genotypes (Fig. 2B). Micro-CT analysis of the subchondral bone plate  
109 revealed a significantly thinner subchondral bone plate in the medial compartment of *Socs2*<sup>-/-</sup>  
110 knee joints, in comparison to WT knee joints (Fig. 3A; SCB Th. WT: 0.15mm ± 0.003;  
111 KO: 0.11mm ± 0.003; P<0.001). DMM had no effect on the subchondral bone plate  
112 thickness in comparison to sham in either WT or *Socs2*<sup>-/-</sup> knee joints (Fig. 3A). Similarly, no  
113 differences were observed in the subchondral bone % BV/TV between genotypes or  
114 osteoarthritis interventions (Fig. 3B). Micro-CT analysis of the epiphyseal trabecular bone  
115 also revealed no effect of DMM on % BV/TV (Fig. 3C), however we observed decrease in  
116 trabecular number (Fig. 3D; Tb. N. WT: 12.3mm<sup>-1</sup> ± 0.2; KO: 10.6mm<sup>-1</sup> ± 0.2; P<0.001)  
117 and increase in trabecular thickness (Fig. 3E; Tb. Th. WT: 0.06mm ± 0.001; KO: 0.07mm ±  
118 0.002; P<0.05) in *Socs2*<sup>-/-</sup> knee joints in comparison to WT knee joints. DMM had no effect  
119 on the epiphyseal bone parameters in comparison to sham in either WT or *Socs2*<sup>-/-</sup> knee joints  
120 (Fig. 3C - F).

#### 121 *Socs2* deletion has no effect on joint ageing

122 To examine the effects of *Socs2* deletion in aged joints, histological examination revealed no  
123 differences in the articular cartilage lesion mean and maximum severity scores between aged  
124 WT and *Socs2*<sup>-/-</sup> mice in any of the joint compartments (Figs. 4A, B & 4C). Similar to our  
125 previous analysis of DMM treated WT and *Socs2*<sup>-/-</sup> mice (Fig. 3), micro-CT analysis of the  
126 subchondral bone revealed thinner subchondral bone plate in the medial compartment of  
127 *Socs2*<sup>-/-</sup> knee joints, in comparison to WT knee joints (Fig. 5A; SCB Th. WT: 0.2mm ±  
128 0.005; KO: 0.1mm ± 0.004; P<0.001). No differences were observed in the subchondral  
129 bone % BV/TV between genotypes (Fig. 5B), however the epiphyseal trabecular BV/TV was  
130 decreased in *Socs2*<sup>-/-</sup> knee joints (Fig. 5C; Tb. BV/TV WT: 73.5% ± 1.5; KO: 64.6% ± 2.2;  
131 P<0.01). No significant differences were observed in trabecular number (Fig. 5D), trabecular  
132 thickness (Fig. 5E) or trabecular separation (Fig. 5F) between aged WT and *Socs2*<sup>-/-</sup> mice.

### 133 **Discussion**

134 Here we sought to examine whether altered growth plate dynamics underpin osteoarthritis  
135 through examination of osteoarthritis vulnerability in a murine model of accelerated growth  
136 (*Socs2*<sup>-/-</sup>). We describe accelerated growth plate fusion in these mice, consistent with their  
137 known overgrowth phenotype. However, we found no effect of a surgical intervention or  
138 ageing on the articular cartilage or subchondral bone phenotype in these mice. This suggests  
139 that in this murine model, aberrant growth dynamics are not associated with vulnerability to  
140 osteoarthritis development.

141 It is well established that in osteoarthritis, chondrocytes in the articular cartilage adopt a more  
142 transient phenotype, similar to that seen in the growth plate (Pitsillides and Beier, 2011). This  
143 raises the question as to whether a greater understanding of the discordant chondrocyte  
144 phenotypes may inform on mechanisms underpinning osteoarthritis, and strategies for  
145 treatment. Our previous work has shown that in a spontaneous model of osteoarthritis  
146 (STR/Ort mouse), there is an association between aberrant growth plate dynamics and

147 osteoarthritis development (Staines et al., 2016). Specifically, we revealed STR/Ort mice  
148 show an overgrowth phenotype with enriched growth plate bridging, which was associated  
149 with articular cartilage lesions at 18-20 weeks of age (Staines et al., 2016). Further, our  
150 previous work on the MRC National Survey of Health and Development revealed modest  
151 associations between greater gains in height in childhood, indicative of accelerated growth,  
152 and decreased odds of knee osteoarthritis at 53 years (Staines et al., 2020). Together this  
153 suggests that the growth rate may play a role in the development of osteoarthritis, although  
154 what that role is has yet to be fully defined.

155 SOCS2 is a negative regulator of GH signalling, via inhibition of the Janus kinase/signal  
156 transducers and activators of transcription (JAK/STAT) pathway (Pass et al., 2009). Thus,  
157 mice deficient in *Socs2*<sup>-/-</sup> display an excessive growth phenotype (Metcalf et al., 2000).  
158 Characterisation of their growth phenotype has revealed increased bone growth rates, growth  
159 plate widths, and chondrocyte proliferation in *Socs2*<sup>-/-</sup> 6 week old mice compared to age-  
160 matched wild-type mice (Pass et al., 2012). *Socs2*<sup>-/-</sup> mice have normal serum levels of GH  
161 and insulin-like growth factor -1 (IGF-1), and their longitudinal growth phenotype is due to  
162 local effects of the GH/IGF-1 axis on the growth plate (Macrae et al., 2009). Consistent with  
163 this, we revealed increased numbers and densities of growth plate bridges in *Socs2*<sup>-/-</sup> mice, in  
164 comparison to WT mice. Growth plate bridges form as the growth slows and undergoes  
165 progressive narrowing. They are also known to form upon growth plate injury, thought to be  
166 through an intramembranous ossification mechanism (Xian et al., 2004). However, whether  
167 growth plate fusion occurs prior to or after the cessation of growth is of significant  
168 controversy in the field and has been somewhat overlooked (Parfitt, 2002).

169 We have previously shown using finite element modelling growth plate bridging to increase  
170 stress dissipation in the subchondral bone region of the joint (Madi et al., 2019; Staines et al.,  
171 2018). It is therefore surprising that the increased growth plate bridging observed in our

172 *Socs2*<sup>-/-</sup> mice here had reduced subchondral bone plate and trabecular parameters. Previous  
173 studies have examined the *Socs2*<sup>-/-</sup> bone phenotype with contradictory results. Our previous  
174 work has shown that *Socs2*<sup>-/-</sup> mice have increased bone mass, trabecular number and  
175 trabecular thickness (Dobie et al., 2018; Macrae et al., 2009). However, others have shown  
176 the absence of SOCS2 to induce losses in cortical and trabecular bone mineral density  
177 (Lorentzon et al., 2005). These results are not consistent with the expected augmented  
178 GH/IGF-1 axis, but are consistent with our findings here and highlight the complexity of this  
179 pathway and the need for further studies to elucidate the precise role of SOCS2 signalling in  
180 bone homeostasis.

181 Increased GH but reduced IGF-1 concentrations are present in synovial fluid of patients with  
182 osteoarthritis (Denko et al., 1996). However, in rodents deficiency of GH and IGF-1 causes  
183 an increased severity of osteoarthritic articular cartilage lesions (Ekenstedt et al., 2006).  
184 Further, it has previously been shown that *Socs2* mRNA levels are decreased in chondrocytes  
185 from osteoarthritic femoral heads (de Andres et al., 2011). Together these data suggest a role  
186 for the GH/IGF-1/SOCS2 pathway in the pathology of osteoarthritis. However, our results  
187 presented here indicate that there is no effect of SOCS2 deficiency on osteoarthritis  
188 vulnerability, and thus highlighting the need to better understand GH/IGF-1 signalling in the  
189 aetiology of osteoarthritis. This may be due to the normal serum levels of GH/IGF-1  
190 observed in *Socs2*<sup>-/-</sup> mice (Macrae et al., 2009).

191 Together, our data show that deletion of SOCS2 leads to accelerated growth plate fusion, but  
192 this has no effect on osteoarthritis vulnerability in a surgical model of osteoarthritis. Future  
193 studies will determine whether this lack of vulnerability is specific to this model of  
194 accelerated longitudinal growth, or whether this is characteristic of osteoarthritis in general.

## 195 **Methods**

### 196 *Animals*



197 *Socs2*<sup>□/□</sup> mice on a C57/BL6 genetic background were generated as previously described  
198 (Dobie et al., 2018). For genotyping, tail biopsied DNA was analysed by PCR for *Socs2* WT  
199 (Forward: TGTTTGACTGAGCTCGCGC, Reverse: CAACTTTAGTGTCTTGGATCT) or  
200 the neocassette (*Socs2*<sup>-/-</sup>; Forward: ACCCTGCACACTCTCGTTTTG, Reverse:  
201 CCTCGACTAAACACATGTAAAGC). Mice were kept in polypropylene cages, with  
202 light/dark 12-h cycles, at 21 ± 2°C, and fed *ad libitum* with maintenance diet (Special Diet  
203 Services, Witham, UK). Ageing studies were completed in 12-13-month-old *Socs2*<sup>□/□</sup> (n=6)  
204 and C57/BL6 wild-type (WT; n=6) male mice (Charles River). Analyses were conducted  
205 blindly to minimise the effects of subjective bias. All experimental protocols were approved  
206 by Roslin Institute's Animal Users Committee and the animals were maintained in  
207 accordance with UK Home Office guidelines for the care and use of laboratory animals.

#### 208 *Destabilisation of the medial meniscus (DMM)*

209 Osteoarthritis was induced in 8-week old *Socs2*<sup>□/□</sup> (n=6) and C57/BL6 WT (n=6) male mice  
210 (Charles River) by surgically induced DMM under isoflurane-induced anaesthesia. Following  
211 transection of the medial meniscotibial ligament to destabilise the medial meniscus, the left  
212 knee joint capsule and skin were closed and anaesthesia reversed. Sham□operated joints  
213 were used as controls. After 8 weeks, knee joints were dissected, fixed in 4%  
214 paraformaldehyde for 24 hours at 4°C, and then stored in 70% ethanol.

#### 215 *Micro-CT analysis*

216 Scans of the right knee joint were performed with an 1172 X-Ray microtomograph (Skyscan,  
217 Belgium) to evaluate the subchondral bone. High-resolution scans with voxel size of 5 µm  
218 were acquired (50 kV, 200µA, 0.5 mm aluminium filter, 0.6° rotation angle). The projection  
219 images were reconstructed using NRecon software version 1.6.9.4 (Skyscan, Belgium). Each  
220 dataset was rotated in DataViewer (Skysan, Belgium) to ensure similar orientation and  
221 alignment for analysis. Hand-drawn regions of interests (ROI) of the subchondral trabecular

222 bone for each femur and tibia lateral/medial compartments was first achieved. Subchondral  
223 bone ROIs was subsequently selected for each compartment. Analysis of subchondral bone  
224 plate thickness and the epiphyseal trabecular bone was achieved using 3D algorithms in  
225 CTAn (Skyscan, Belgium) to provide: subchondral bone plate thickness (SCB Th.; mm);  
226 subchondral bone plate bone volume/tissue volume (SCB BV/TV; %); epiphyseal trabecular  
227 bone volume/tissue volume (Tb. BV/TV; %); trabecular number (Tb. N.;  $\text{mm}^{-1}$ ); trabecular  
228 thickness (Tb. Th.; mm) and trabecular separation (Tb. Sp.; mm).

### 229 *Growth plate bridging analysis*

230 Growth plate bridging analysis was conducted using a 3D micro-CT quantification method as  
231 previously described (Madi et al., 2019; Staines et al., 2018). Briefly, micro-CT scans of the  
232 tibiae were segmented using a region-growing algorithm within the Avizo® (V8.0, VSG,  
233 Burlington, VT, USA) software. The central points of all bony bridges were identified and  
234 projected on the tibial joint surface. The distribution of the areal number density of bridges  
235 (N, the number of bridges per  $256 \mu\text{m} \times 256 \mu\text{m}$  window) is then calculated and  
236 superimposed on the tibial joint surface (each bridge has a colour that represents the areal  
237 number density at the bridge location).

### 238 *Histological analysis*

239 Murine left knee joints were decalcified, wax-embedded and  $6\mu\text{m}$  coronal sections cut. For  
240 assessment of osteoarthritis severity, multiple sections ( $>5/\text{slide}$ ) from  $120\mu\text{m}$  intervals across  
241 the whole joint were stained with Toluidine blue (0.4% in 0.1 M acetate buffer, pH 4).  
242 Articular cartilage damage was assessed in the medial tibia using the well-established OARSI  
243 grading scale, with scores averaged (Glasson et al., 2010). Osteophytes were also scored  
244 where 0 = none; 1 = formation of cartilage-like tissue; 2 = increase in cartilaginous matrix; 3  
245 = endochondral ossification (Nagira et al., 2020). Scoring was conducted blindly with by two  
246 observers.

247 *Statistical analysis*

248 All analyses were performed with GraphPad Prism software 6.0f version (GraphPad Inc, La  
249 Jolla, CA, USA). The results were presented as the mean  $\pm$  standard error of the mean (SEM).  
250 Normal distribution of data was assessed using the Shapiro-Wilk normality test. For the  
251 growth plate bridging and micro-CT analysis, two-way ANOVA with Bonferroni adjustments  
252 for multiple comparisons were used. For articular cartilage damage, the Kruskal-Wallis one-  
253 way ANOVA was used for DMM studies, and the Mann-Whitney U test for ageing studies.  
254 The significance was set at  $P < 0.05$ .

255 **Acknowledgements**

256 The authors would like to thank Dr Blandine Poulet of University of Liverpool, Institute of  
257 Ageing and Chronic Disease for her guidance in experimental techniques and insightful  
258 discussions throughout preparation.

259 **Competing interests**

260 No competing interests declared

261 **Funding**

262 This work was supported by the Medical Research Council [MR/R022240/2] and a  
263 University of Brighton Rising Star Award, both to KS. CF was supported by the  
264 Biotechnology and Biological Sciences Research Council (BBSRC) via an Institute Strategic  
265 Programme Grant (BB/J004316/1).

266 **Data availability**

267 Data are available upon reasonable request to the corresponding author.

268 **Author contributions**

269 Conception and design of the study: KAS, CF, HJS. Acquisition of data: HJS, KAS, CH,  
270 LCL. Drafting the manuscript: HJS, KAS. Revising the manuscript and final approval, and  
271 agreement to be accountable for all aspects of the work: all authors.

## 272 **References**

- 273 **Aigner, T., Zhu, Y., Chansky, H. H., Matsen, F. A., Maloney, W. J. and Sandell, L. J.**  
274 (1999). Reexpression of type IIA procollagen by adult articular chondrocytes in  
275 osteoarthritic cartilage. *Arthritis and Rheumatism* **42**, 1443–1450.
- 276 **Aspden, R. M. and Saunders, F. R.** (2019). Osteoarthritis as an organ disease: From the  
277 cradle to the grave. *European Cells and Materials* **37**, 74–87.
- 278 **Baird, D. A., Paternoster, L., Gregory, J. S., Faber, B. G., Saunders, F. R., Giuraniuc,**  
279 **C. V., Barr, R. J., Lawlor, D. A., Aspden, R. M. and Tobias, J. H.** (2018).  
280 Investigation of the Relationship Between Susceptibility Loci for Hip Osteoarthritis and  
281 Dual X-Ray Absorptiometry–Derived Hip Shape in a Population-Based Cohort of  
282 Perimenopausal Women. *Arthritis and Rheumatology* **70**, 1984–1993.
- 283 **Baird, D. A., Evans, D. S., Kamanu, F. K., Gregory, J. S., Saunders, F. R., Giuraniuc, C.**  
284 **V., Barr, R. J., Aspden, R. M., Jenkins, D., Kiel, D. P., et al.** (2019). Identification of  
285 Novel Loci Associated With Hip Shape: A Meta-Analysis of Genomewide Association  
286 Studies. *Journal of Bone and Mineral Research* **34**, 241–251.
- 287 **Chang, S. H., Mori, D., Kobayashi, H., Mori, Y., Nakamoto, H., Okada, K., Taniguchi,**  
288 **Y., Sugita, S., Yano, F., Chung, U. il, et al.** (2019). Excessive mechanical loading  
289 promotes osteoarthritis through the gremlin-1–NF- $\kappa$ B pathway. *Nature Communications*  
290 **10**, 1–5.
- 291 **Cramer, A., De Lima Oliveira, B. C., Leite, P. G., Rodrigues, D. H., Brant, F., Esper, L.,**  
292 **Pimentel, P. M. O., Rezende, R. M., Rachid, M. A., Teixeira, A. L., et al.** (2019).  
293 Role of SOCS2 in the Regulation of Immune Response and Development of the  
294 Experimental Autoimmune Encephalomyelitis. *Mediators of Inflammation* **2019**,.
- 295 **de Andres, M. C., Imagawa, K., Hashimoto, K., Gonzalez, A., Goldring, M. B., Roach,**  
296 **H. I. and Oreffo, R. O. C.** (2011). Suppressors of cytokine signalling (SOCS) are  
297 reduced in osteoarthritis. *Biochemical and Biophysical Research Communications* **407**,  
298 54–59.
- 299 **Denko, B. Y. C. W., Boja, B. and Moskowitz, R. W.** (1996). Growth factors, insulin-like  
300 growth factor-1 and growth hormone, in synovial fluid and serum of patient  
301 with rheumatic disorders. 245–249.

- 302 **Dobie, R., MacRae, V. E., Pass, C., E.M., M., S.F., A. and C., F.** (2018). Suppressor of  
303 cytokine signaling 2 (Socs2) deletion protects bone health of mice with DSS-induced  
304 inflammatory bowel disease. *DMM Disease Models and Mechanisms* **11**.
- 305 **Echtermeyer, F., Bertrand, J., Dreier, R., Meinecke, I., Neugebauer, K., Fuerst, M., Lee,**  
306 **Y. J., Song, Y. W., Herzog, C., Theilmeier, G., et al.** (2009). Syndecan-4 regulates  
307 ADAMTS-5 activation and cartilage breakdown in osteoarthritis. *Nature Medicine* **15**,  
308 1072–1076.
- 309 **Ekenstedt, K. J., Sonntag, W. E., Loeser, R. F., Lindgren, B. R. and Carlson, C. S.**  
310 (2006). Effects of chronic growth hormone and insulin-like growth factor 1 deficiency  
311 on osteoarthritis severity in rat knee joints. *Arthritis and Rheumatism* **54**, 3850–3858.
- 312 **Glasson, S. S., Askew, R., Sheppard, B., Carito, B., Blanchet, T., Ma, H. L., Flannery, C.**  
313 **R., Peluso, D., Kanki, K., Yang, Z., et al.** (2005). Deletion of active ADAMTS5  
314 prevents cartilage degradation in a murine model of osteoarthritis. *Nature* **434**, 644–648.
- 315 **Glasson, S. S., Chambers, M. G., Van Den Berg, W. B. and Little, C. B.** (2010). The  
316 OARSI histopathology initiative – recommendations for histological assessments of  
317 osteoarthritis in the mouse. *Osteoarthritis and Cartilage* **18**, S17–S23.
- 318 **Keating, N. and Nicholson, S. E.** (2019). SOCS-mediated immunomodulation of natural  
319 killer cells. *Cytokine* **118**, 64–70.
- 320 **Kronenberg, H. M.** (2003). Developmental regulation of the growth plate. *Nature* **423**, 332–  
321 336.
- 322 **Letellier, E. and Haan, S.** (2016). SOCS2□: physiological and pathological functions 3 .  
323 BIOLOGICAL FUNCTIONS OF SOCS2. *Frontiers in Bioscience* 189–204.
- 324 **Lorentzon, M., Greenhalgh, C. J., Mohan, S., Alexander, W. S. and Ohlsson, C.** (2005).  
325 Reduced bone mineral density in SOCS-2-deficient mice. *Pediatric Research* **57**, 223–  
326 226.
- 327 **Macrae, V. E., Horvat, S., Pells, S. C., Dale, H., Collinson, R. S., Pitsillides, A. A.,**  
328 **Ahmed, S. F. and Farquharson, C.** (2009). Increased bone mass, altered trabecular  
329 architecture and modified growth plate organization in the growing skeleton of SOCS2  
330 deficient mice. *Journal of Cellular Physiology* **218**, 276–284.
- 331 **Madi, K., Staines, K. A., Bay, B. K., Javaheri, B., Geng, H., Bodey, A. J., Cartmell, S.,**  
332 **Pitsillides, A. A. and Lee, P. D.** (2019). In situ characterization of nanoscale strains in  
333 loaded whole joints via synchrotron X-ray tomography. *Nature Biomedical Engineering*  
334 **4**, 343–354.
- 335 **Metcalf, D., Greenhalgh, C. J., Viney, E., Wilison, T. A., Starr, R., Nicola, N. A., Hilton,**  
336 **D. J. and Alexander, W. S.** (2000). Gigantism in mice lacking suppressor of cytokine  
337 signalling-2. *Nature* **405**, 1069–1073.

- 338 **Nagao, M., Hamilton, J. L., Kc, R., Berendsen, A. D., Duan, X., Cheong, C. W., Li, X.,**  
339 **Im, H. J. and Olsen, B. R.** (2017). Vascular Endothelial Growth Factor in Cartilage  
340 Development and Osteoarthritis. *Scientific Reports* **7**, 1–16.
- 341 **Nagira, K., Ikuta, Y., Shinohara, M., Sanada, Y., Omoto, T., Kanaya, H., Nakasa, T.,**  
342 **Ishikawa, M., Adachi, N., Miyaki, S., et al.** (2020). Histological scoring system for  
343 subchondral bone changes in murine models of joint aging and osteoarthritis. *Scientific*  
344 *Reports* **10**, 10077.
- 345 **Parfitt, A. M.** (2002). Misconceptions (1): Epiphyseal fusion causes cessation of growth.  
346 *Bone* **30**, 337–339.
- 347 **Pass, C., MacRae, V. E., Ahmed, S. F. and Farquharson, C.** (2009). Inflammatory  
348 cytokines and the GH/IGF-I axis: Novel actions on bone growth. *Cell Biochemistry and*  
349 *Function* **27**, 119–127.
- 350 **Pass, C., MacRae, V. E., Huesa, C., Faisal Ahmed, S. and Farquharson, C.** (2012).  
351 SOCS2 is the critical regulator of GH action in murine growth plate chondrogenesis.  
352 *Journal of Bone and Mineral Research* **27**, 1055–1066.
- 353 **Pitsillides, A. A. and Beier, F.** (2011). Cartilage biology in osteoarthritis - Lessons from  
354 developmental biology. *Nature Reviews Rheumatology* **7**, 654–663.
- 355 **Saito, T., Fukai, A., Mabuchi, A., Ikeda, T., Yano, F., Ohba, S., Nishida, N., Akune, T.,**  
356 **Yoshimura, N., Nakagawa, T., et al.** (2010). Transcriptional regulation of  
357 endochondral ossification by HIF-2 $\alpha$  during skeletal growth and osteoarthritis  
358 development. *Nature Medicine* **16**, 678–686.
- 359 **Samvelyan, H. J., Hughes, D., Stevens, C. and Staines, K. A.** (2020). Models of  
360 Osteoarthritis: Relevance and New Insights. *Calcified Tissue International*.
- 361 **Staines, K. A., Madi, K., Mirczuk, S. M., Parker, S., Burleigh, A., Poulet, B., Hopkinson,**  
362 **M., Bodey, A. J., Fowkes, R. C., Farquharson, C., et al.** (2016). Endochondral  
363 Growth Defect and Deployment of Transient Chondrocyte Behaviors Underlie  
364 Osteoarthritis Onset in a Natural Murine Model. *Arthritis and Rheumatology* **68**, 880–  
365 891.
- 366 **Staines, K. A., Madi, K., Javaheri, B., Lee, P. D. and Pitsillides, A. A.** (2018). A  
367 computed microtomography method for understanding epiphyseal growth plate fusion.  
368 *Frontiers in Materials* **4**.
- 369 **Staines, K. A., Hardy, R. J., Samvelyan, H. J., Ward, K. A. and Cooper, R.** (2020). Life  
370 course longitudinal growth and risk of knee osteoarthritis at age 53 years: evidence from  
371 the 1946 British birth cohort study.
- 372 **Wang, M., Sampson, E. R., Jin, H., Li, J., Ke, Q. H., Im, H. J. and Chen, D.** (2013).  
373 MMP13 is a critical target gene during the progression of osteoarthritis. *Arthritis*  
374 *Research and Therapy* **15**, 1–11.

375 **Xian, C. J., Zhou, F. H., McCarty, R. C. and Foster, B. K.** (2004). Intramembranous  
376 ossification mechanism for bone bridge formation at the growth plate cartilage injury  
377 site. *Journal of Orthopaedic Research* **22**, 417–426.

378

379 **Figure 1. Socs2 deficient mice exhibit accelerated growth plate fusion mechanisms.** (A)

380 Location and areal densities of bridges across the growth plate projected on the medial (M)

381 and lateral (L) tibial joint surface in WT and Socs2<sup>-/-</sup> (KO) DMM and sham operated joints.

382 (B) Number of bridges. (C) Areal density (d) of bridges defined as the number of bridges per

383 256 mm x 256 mm window. (D) Location and areal densities of bridges across the growth

384 plate projected on the medial (M) and lateral (L) tibial joint surface in aged WT and Socs2<sup>-/-</sup>

385 (KO) mice. (E) Number of bridges (F) Areal density (d) of bridges defined as the number of

386 bridges per 256 mm x 256 mm window. Data are presented as mean ± SEM and showing

387 individual animals. Statistical test performed: Two-way ANOVA with Bonferroni

388 adjustments for multiple comparisons within each joint compartment. \*  $p < 0.05$  \*\*  $p < 0.01$

389 \*\*\*  $p < 0.001$

390 **Figure 2. Deletion of Socs2 does not prevent osteoarthritic articular cartilage lesions in a**

391 **surgical model of osteoarthritis.** (A) Toluidine blue stained sections of the knee joint of WT

392 and Socs2<sup>-/-</sup> (KO) mice showing development of articular cartilage lesions in the medial tibia.

393 (B) Osteophyte severity score (C) Mean articular cartilage damage OARSI score and (D)

394 Maximum articular cartilage damage OARSI score in WT sham (n = 3), WT DMM (n = 6),

395 KO sham (n = 6) and KO DMM (n = 6). Scale bar = 0.05mm. Data are presented as mean ±

396 SEM and showing individual animals. Statistical test performed: Kruskal-Wallis one-way

397 ANOVA.

398 **Figure 3. Socs2 deficient mice exhibit decreased subchondral bone plate and trabecular**

399 **number, irrespective of DMM surgically induced osteoarthritis.** Micro-CT analysis of the

400 medial and lateral tibial (A) Subchondral bone plate (SCB) thickness (mm) (B) SCB bone  
401 volume/tissue volume (BV/TV; %) (C) Epiphyseal trabecular BV/TV (%) (D) Epiphyseal  
402 trabecular number ( $\text{mm}^{-1}$ ) (E) Epiphyseal trabecular thickness (mm) (F) Epiphyseal  
403 trabecular separation (mm) in WT and *Socs2*<sup>-/-</sup> (KO) mice with DMM or sham surgery  
404 (n=6/group). Data are presented as mean  $\pm$  SEM and showing individual animal data.  
405 Statistical test performed: Two-way ANOVA with Bonferroni adjustments for multiple  
406 comparisons. \*P<0.05; \*\*\*P<0.001.

407 **Figure 4. Deletion of *Socs2* does not prevent osteoarthritic articular cartilage lesions**  
408 **with ageing.** (A) Toluidine blue stained sections of the knee joint of WT and *Socs2*<sup>-/-</sup> (KO)  
409 mice showing development of articular cartilage lesions in the medial tibia. (B) Mean  
410 articular cartilage damage OARSI score across the knee joint and (C) Maximum articular  
411 cartilage damage OARSI score between WT (n=5) and KO (n=6) mice with ageing, in the  
412 medial tibia of the knee joint. Scale bar = 0.05mm. Data are presented as mean  $\pm$  SEM and  
413 showing individual animal data. Statistical test performed: Mann-Whitney U test.

414 **Figure 5. Aged *Socs2* deficient mice exhibit decreased subchondral bone plate thickness.**  
415 Micro-CT analysis of the medial and lateral tibial (A) Subchondral bone plate (SCB)  
416 thickness (mm) (B) SCB bone volume/tissue volume (BV/TV; %) (C) Epiphyseal trabecular  
417 BV/TV (%) (D) Epiphyseal trabecular number ( $\text{mm}^{-1}$ ) (E) Epiphyseal trabecular thickness  
418 (mm) (F) Epiphyseal trabecular separation (mm) in aged WT and *Socs2*<sup>-/-</sup> (KO) mice  
419 (n=6/group). Data are presented as mean  $\pm$  SEM and showing individual animals. Statistical  
420 test performed: Two-way ANOVA with Bonferroni adjustments for multiple comparisons.  
421 \*P<0.05; \*\*\*P<0.001.

422 **Table 1: Weights of wild type (WT) and *Socs2*<sup>-/-</sup> (KO) mice during 8-week post-DMM**  
423 **experimental timeline.**

|  | Weight (g) |
|--|------------|
|--|------------|



| <b>Week</b>    | <b>0</b>   | <b>1</b>   | <b>2</b>   | <b>3</b>   | <b>4</b>   | <b>5</b>   | <b>6</b>   | <b>7</b>   | <b>8</b>   |
|----------------|------------|------------|------------|------------|------------|------------|------------|------------|------------|
| <b>WT sham</b> | 23.2 ± 0.4 | 22.2 ± 1.0 | 24.0 ± 0.4 | 25.6 ± 0.5 | 26.4 ± 0.7 | 27.0 ± 0.7 | 27.6 ± 0.8 | 28.2 ± 0.8 | 29.0 ± 0.7 |
| <b>WT DMM</b>  | 22.4 ± 0.3 | 21.8 ± 0.3 | 23.0 ± 0.3 | 24.0 ± 0.4 | 24.5 ± 0.3 | 24.9 ± 0.3 | 25.6 ± 0.4 | 25.7 ± 0.3 | 26.5 ± 0.3 |
| <b>KO sham</b> | 32.3 ± 1.2 | 33.6 ± 0.9 | 34.8 ± 1.1 | 35.0 ± 1.0 | 36.4 ± 1.1 | 38.1 ± 1.3 | 38.7 ± 0.9 | 39.0 ± 0.9 | 40.4 ± 0.9 |
| <b>KO DMM</b>  | 31.3 ± 0.8 | 33.0 ± 0.7 | 33.7 ± 0.7 | 34.9 ± 1.0 | 35.8 ± 1.0 | 39.8 ± 0.6 | 38.3 ± 1.1 | 38.9 ± 1.1 | 40.3 ± 1.0 |

424

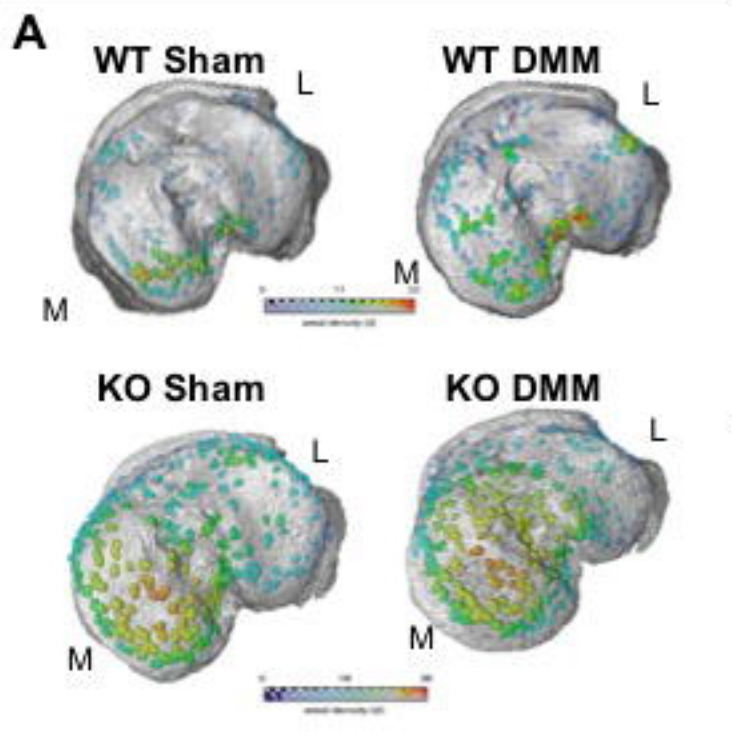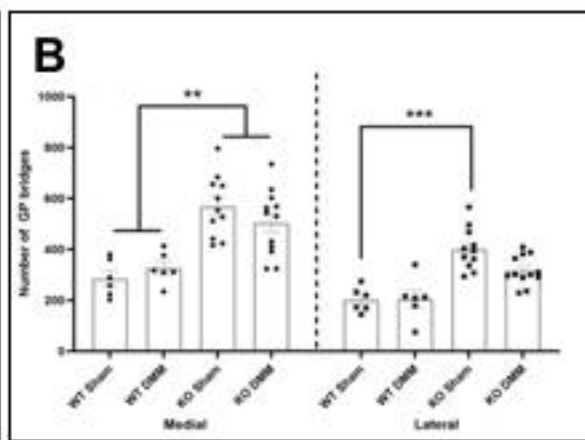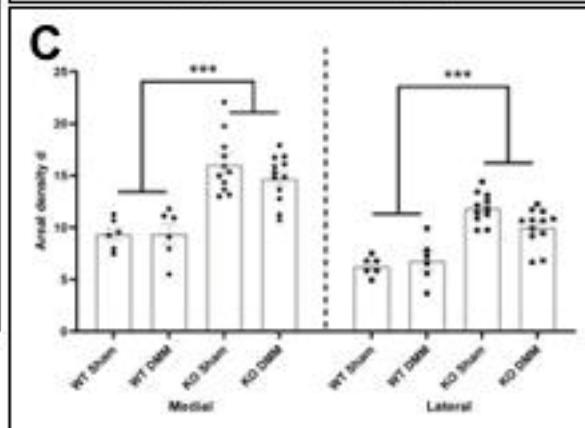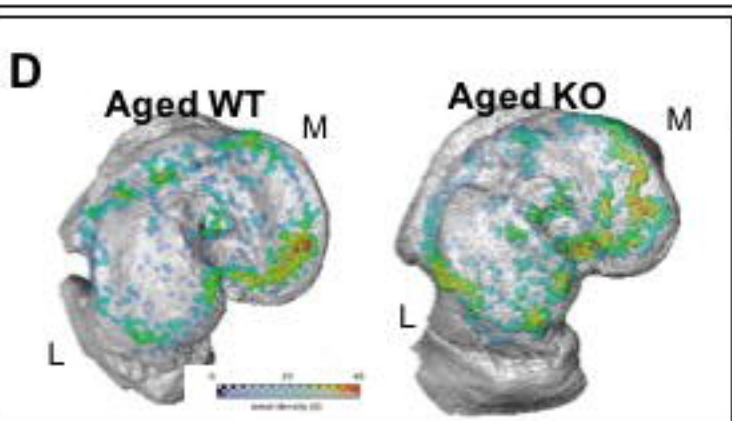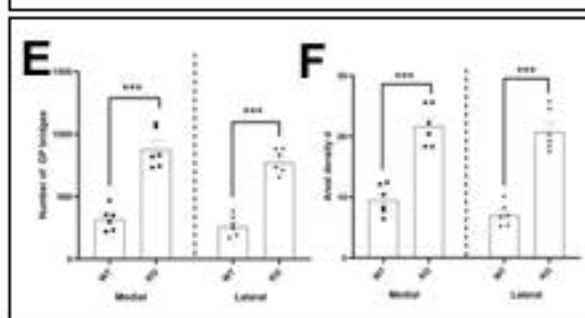

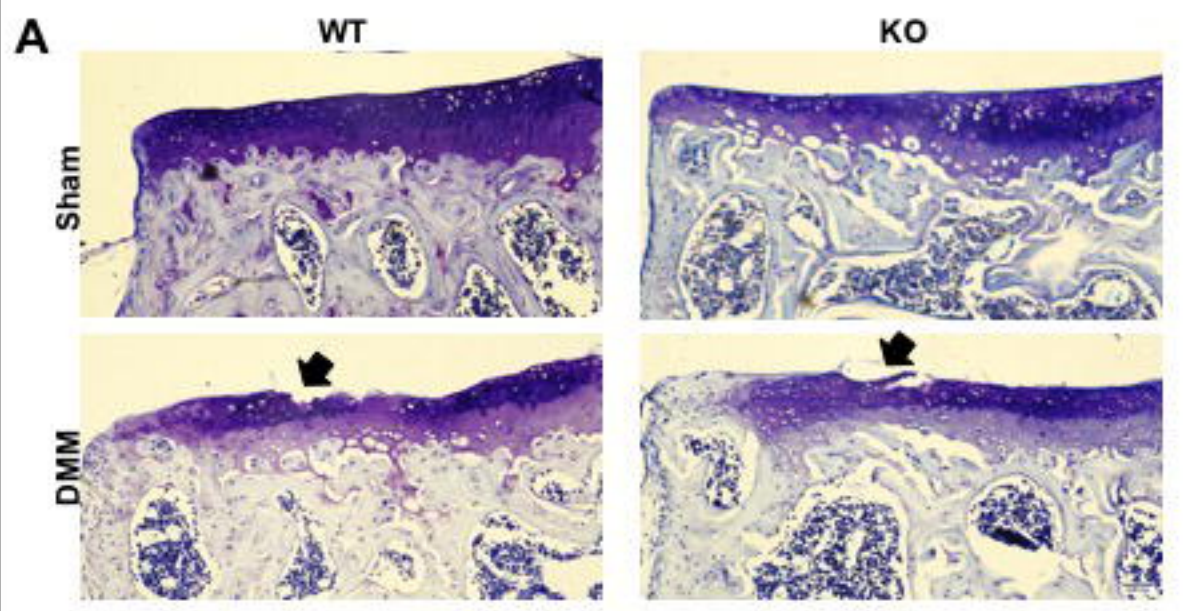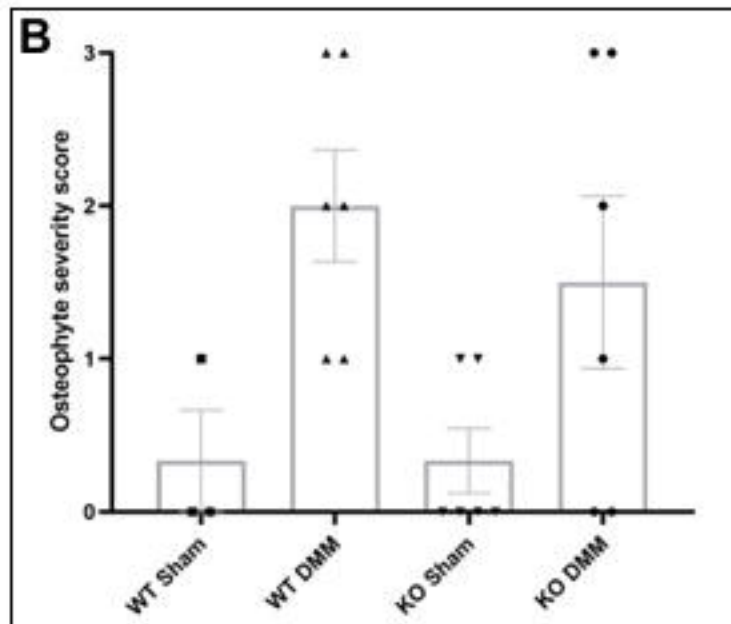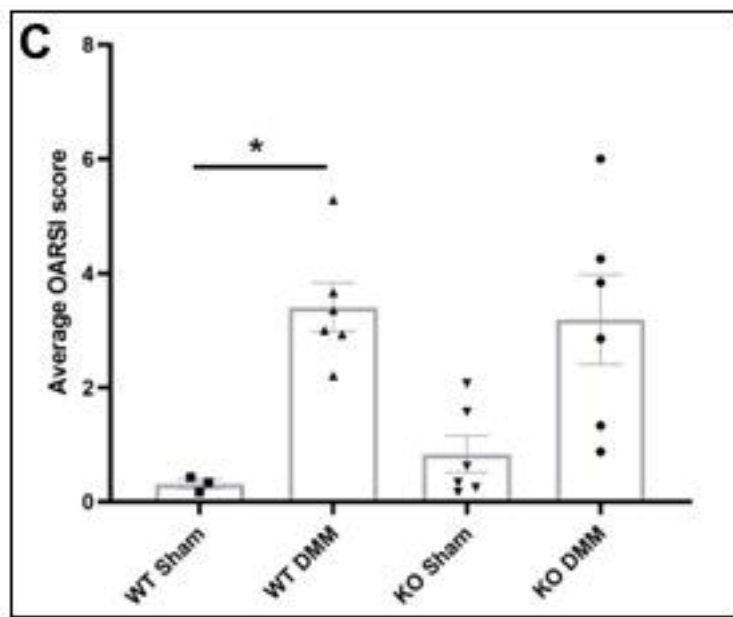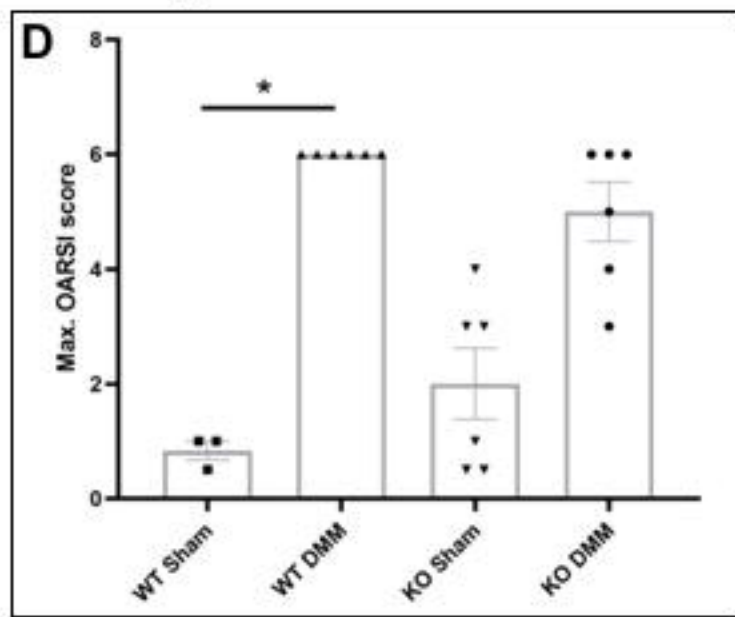

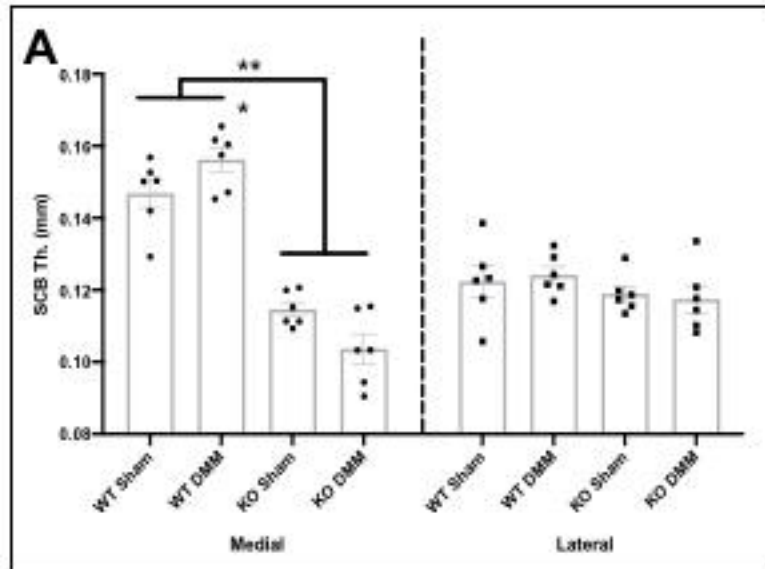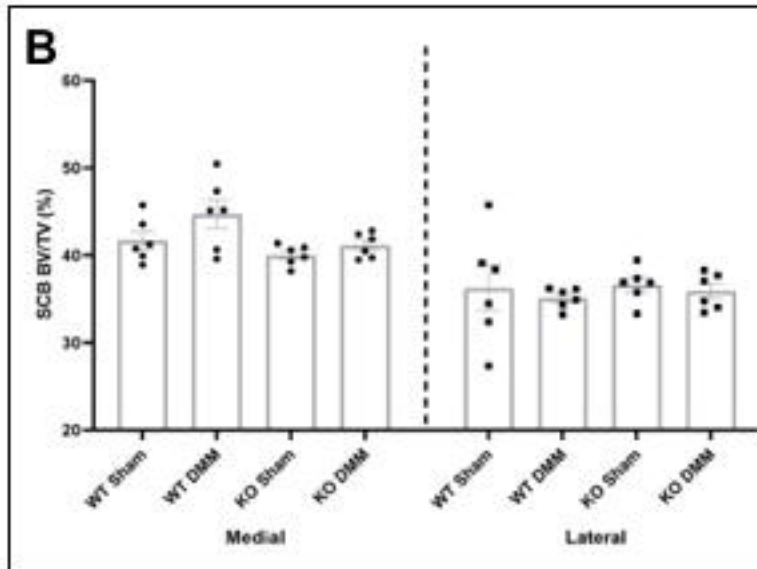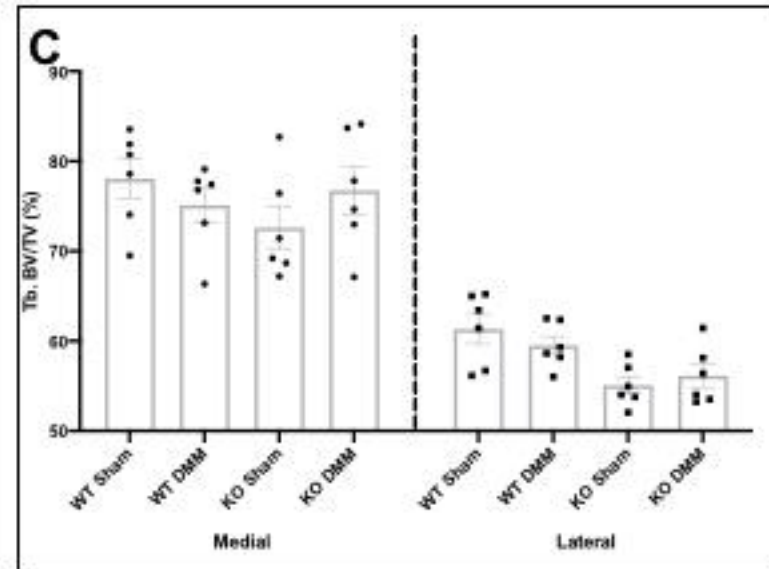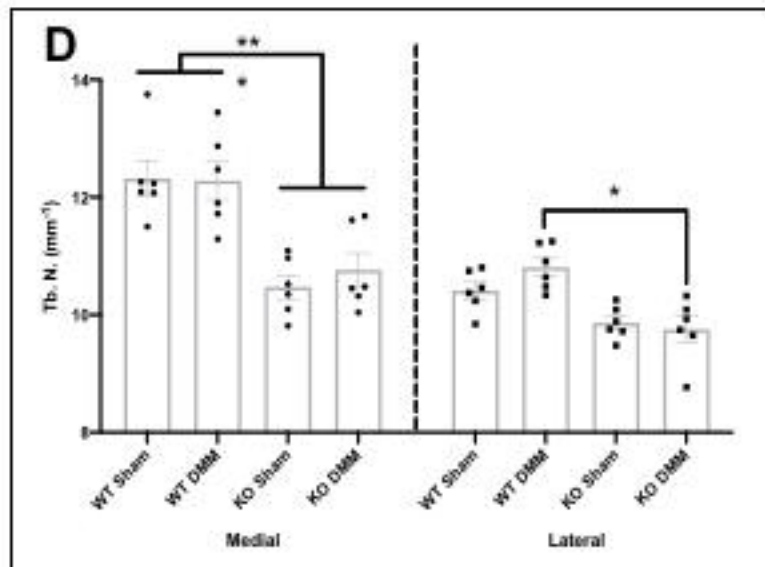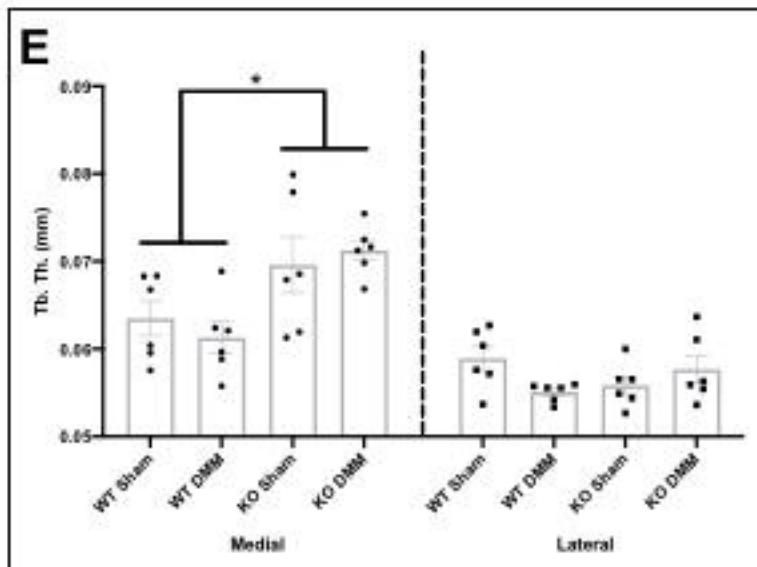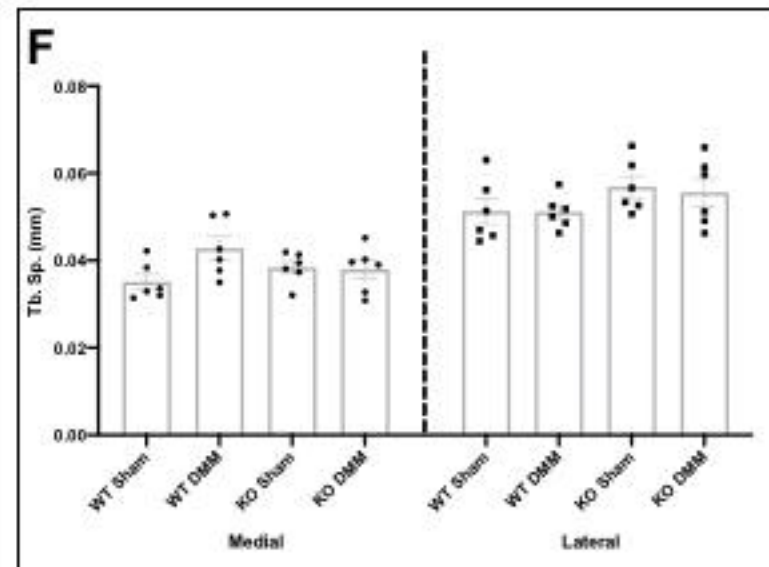

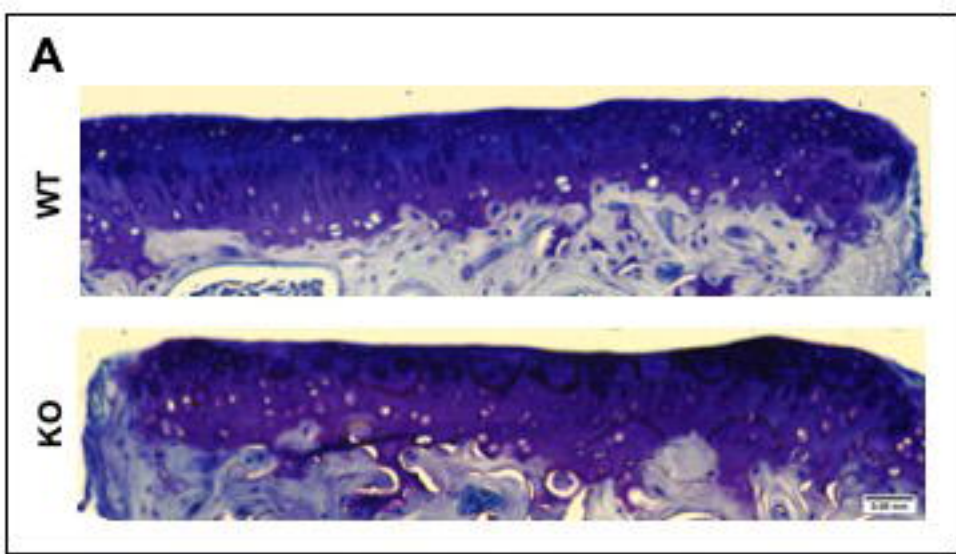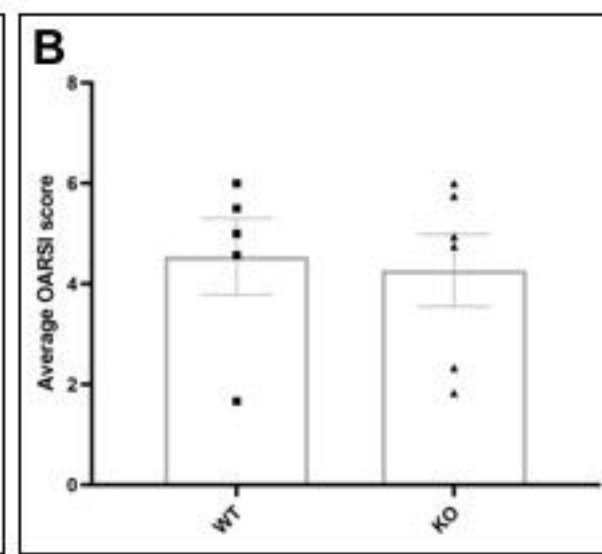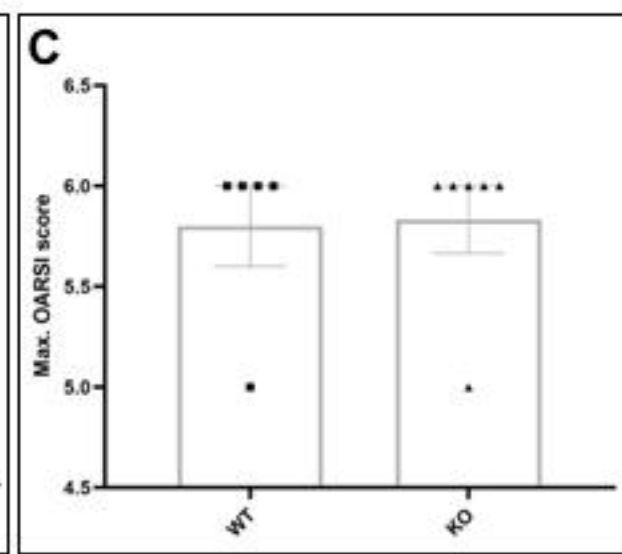

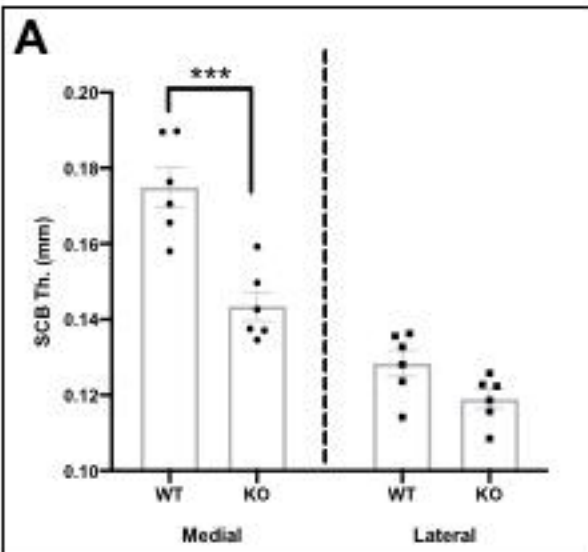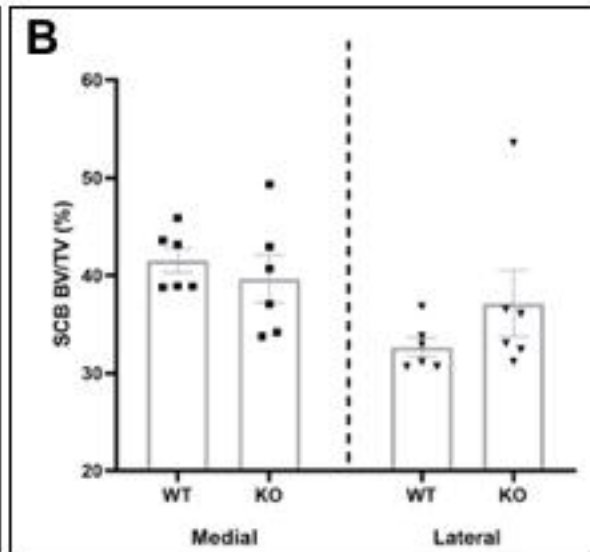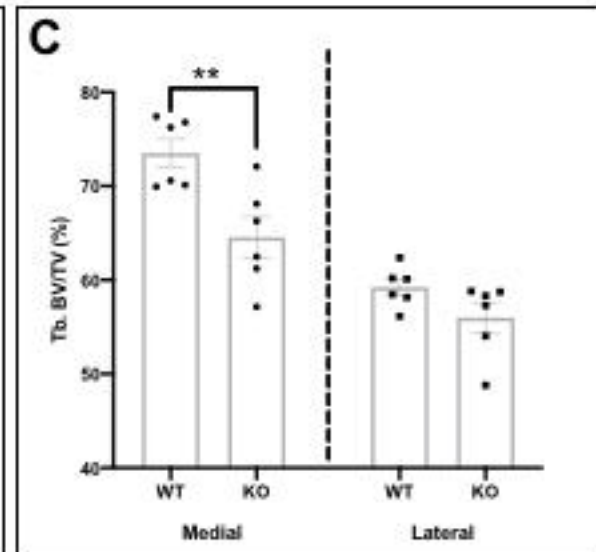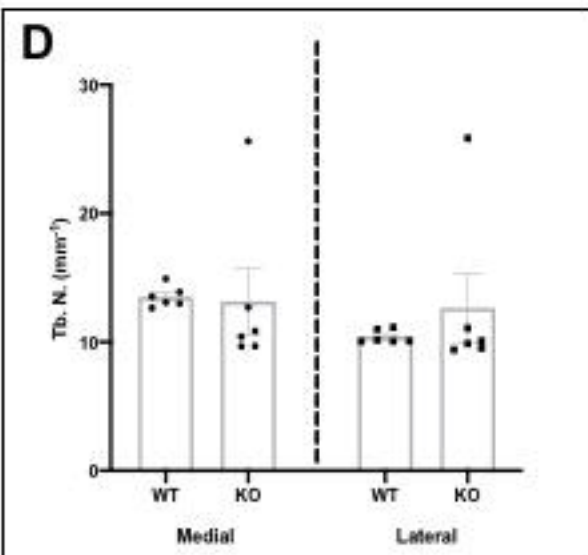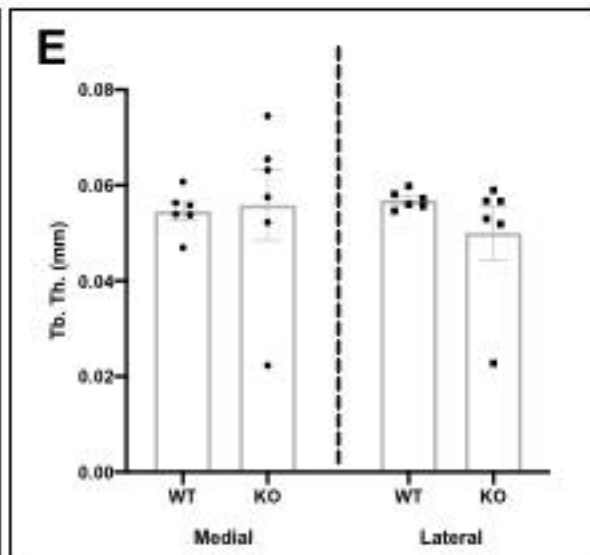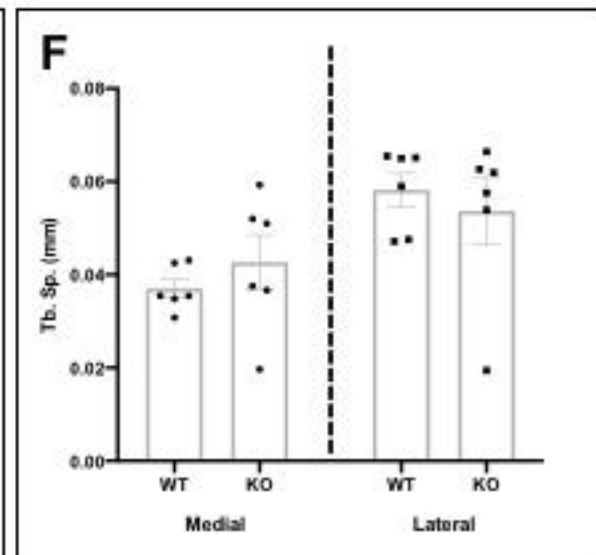

Source: http://biorxiv.org/content/10.1101/2021.05.13.444074v1.full.pdf
